# Supplementary material for: Predicting intersystem crossing efficiencies of organic molecules for efficient thermally activated delayed fluorescence
Source: Royal Society of Chemistry journal article supplement (doi:10.1039/c9tc03152a), 2019-01-01
Supplement: c9tc03152a1.pdf [file c9tc03152a1.pdf]

## Supplementary Information

### Predicting Intersystem Crossing Efficiencies of Organic Molecules for Efficient Thermally Activated Delayed Fluorescence

Shen Xu,<sup>a</sup> Qingqing Yang,<sup>a</sup> Yifang Wan,<sup>a</sup> Runfeng Chen,<sup>\*a</sup> Shuang Wang,<sup>a</sup> Yubing Si,<sup>\*b</sup> Baocheng Yang,<sup>b</sup> Dan Liu,<sup>c</sup> Chao Zheng<sup>a</sup> and Wei Huang<sup>\*a c</sup>

- <sup>a</sup> Key Laboratory for Organic Electronics and Information Displays & Jiangsu Key Laboratory for Biosensors, Institute of Advanced Materials (IAM), Jiangsu National Synergistic Innovation Center for Advanced Materials (SICAM), Nanjing University of Posts & Telecommunications, 9 Wenyuan Road, Nanjing 210023, People's Republic of China.
- <sup>b</sup> Henan Key Laboratory of Nanocomposites and Applications, Institute of Nanostructured Functional Materials, Huanghe Science and Technology College, Zhengzhou 450006, People's Republic of China.
- <sup>c</sup> Shaanxi Institute of Flexible Electronics (SIFE), Northwestern Polytechnical University (NPU), 127 West Youyi Road, Xi'an, 710072, People's Republic of China

E-mail: iamrfchen@njupt.edu.cn; yubingsi@infm.hhstu.edu.cn; iamwhuang@njupt.edu.cn.

This file includes:

**Figure S1:** Potential energy surface of  $S_0$ ,  $S_1$  and  $T_1$ .

**Figure S2:** Absolute deviation of  $E_{S_1}$ ,  $E_{T_1}$  and  $\Delta E_{ST}$  of 7 different functionals against experimental values.

**Figure S3:** Empirical relation between the experimental  $k_{ISC}$  and calculated  $\Delta\alpha_n$ .

**Figure S4:** Empirical relation between the experimental  $k_{ISC}$  and calculated  $|s_H-s_L|$ .

**Table S1:** Absolute variation of Calculated  $E_{S_1}$ ,  $E_{T_1}$ ,  $\Delta E_{ST}$  using different functionals against Experimental Data.

**Table S2:** Dihedral angles between the donor and acceptor units at  $S_1$  and  $T_1$  states as well as the dihedral angle changes during the  $S_1 \leftrightarrow T_1$  transition of investigated TADF molecules.

**Tables S3–S8:** Calculated configuration proportion  $\alpha_n\%$  of HONTO for  $S_1$ ,  $T_1$  and  $T_2$  state based on MPA of **ACRFLCN**, **DMAC-DPS**, **2CzPN**, **ACRXTN**, **Ac-OPO** and **Ac-OSO**.

**Tables S9–S10:** Calculated  $|s_H+s_L|$  (%) based on NTO analysis of  $S_0$  geometry and  $|s_H-s_L|$  (%) based on NTO analysis of  $T_1$  geometry.

**Tables S11–S16:** Calculated transition configuration of  $S_1$  and  $T_1$ - $T_3$  for **ACRFLCN**, **DMAC-DPS**, **2CzPN**, **ACRXTN**, **Ac-OPO** and **Ac-OSO**.

## Computational Methodology

The density functional theory (DFT) and time-dependent density functional dependent theory (TD-DFT) calculations were performed to investigate the singlet/triplet exciton transformation using Gaussian 09 package.<sup>1</sup> The Beckers three-parameter exchange functional<sup>2</sup> along with the Lee Yang Parr's correlation functional<sup>3</sup> (B3LYP) that can well predict the geometric structures of organic molecules, was adopted to optimize the ground state ( $S_0$ ) geometries of all molecules in assistant with the 6-31G(d) basis set. The optimized structures were further characterized by harmonic vibrational frequency analysis to confirm that real local minima without any imaginary frequency was reached at the same computational level. As for excited states, TDDFT/B3LYP/6-31G\* and unrestricted DFT (UDFT)/B3LYP/6-31G\* were used to optimize geometries of lowest singlet excited state ( $S_1$ ) and lowest singlet excited state ( $T_1$ ), respectively, and to calculate their energies. Since the configurations of charge-transfer (CT) characteristics are related to different HF exchange percentage, exchange-correlation (XC) functionals, including B3LYP (20% HF), PBE0 (25% HF), BMK (42% HF), M06-2X (56% HF), and M06-HF (100% HF) functionals, as well as long-range functionals of  $\omega$ B97XD and CAM-B3LYP, were investigated. B3LYP functional was selected eventually owing to the smallest absolute deviation between theoretical and experimental values.

To get further insights into the nature of the excited states, natural transition orbitals (NTOs) analysis was performed based on TD-DFT results to offer a compact orbital representation for the electronic transition density matrix. In addition, using the overlap integral function embedded in Multiwfn<sup>4</sup>, the overlap integrals of  $I_{S/T}$  between the highest occupied NTO (HONTO) and the lowest unoccupied NTO (LUNTO) of investigated molecules can be calculated. To identify proportion of ( $n, \pi^*$ ) configuration ( $\alpha_n\%$ ) of the excited states, Mulliken population analysis (MPA) was performed to calculate the  $n$  orbital components with the aid of Multiwfn package. Electron density differences (EDD) from  $S_0$  to  $S_1$  and  $S_0$  to  $T_n$  based on optimized  $S_0$  geometries was also performed in the assistant of Multiwfn package. Following the previously developed calculation method of charge transfer amount, excited state similarity in HONTO ( $s_H$ ) and LUNTO ( $s_L$ ) between the singlet and triplet excited states can be calculated according to equation:

$$S_{H/L} = 1 - \frac{\sum_i |a_i - b_i|}{2} \quad (1)$$

where  $\sum_i a_i = 1$  and  $\sum_i b_i = 1$ . The index  $i$  is the number of atoms in the molecule;  $a_i$  and  $b_i$  are the contribution percentages of different atoms in the frontier NTO of the corresponding singlet and triplet excited states, respectively. This orbital composition analysis was done by using Multiwfn.<sup>4</sup>  $|a_i - b_i|$  denotes the contribution percentage difference of an atom ( $i$ ) in the HONTO (or LUNTO) between the singlet and triplet excited states.

Based on B3LYP functional and cc-pVDZ basis set, spin-orbit coupling (SOC) matrix

elements between the singlet and triplet excited states are calculated with quadratic response function methods using the Dalton program.<sup>5</sup> The process of intersystem crossing (ISC) and reverse intersystem crossing (RISC) can be described as:

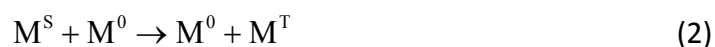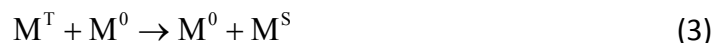

where  $M^0$  is the ground state molecule interacting with the neighboring excited singlet or triplet molecule ( $M^S/M^T$ ) to transfer the energy between them. Therefore, the ISC or RISC reorganization energy ( $\lambda_{in, ISC/RISC}$ ), in principle, can be calculated in equations 4 and 5:

$$\lambda_{in}^{ISC} = E^T(M^S) - E^T(M^T) \quad (4)$$

$$\lambda_{in}^{RISC} = E^S(M^T) - E^S(M^S) \quad (5)$$

Here,  $E^T(M^S)$  and  $E^T(M^T)$  are the total energies of the triplet species under the optimum geometry of  $M^S$  and  $M^T$ , respectively;  $E^S(M^T)$  and  $E^S(M^S)$  represent the total energies of the singlet molecule under the optimum geometry of  $M^T$  and  $M^S$ , respectively.

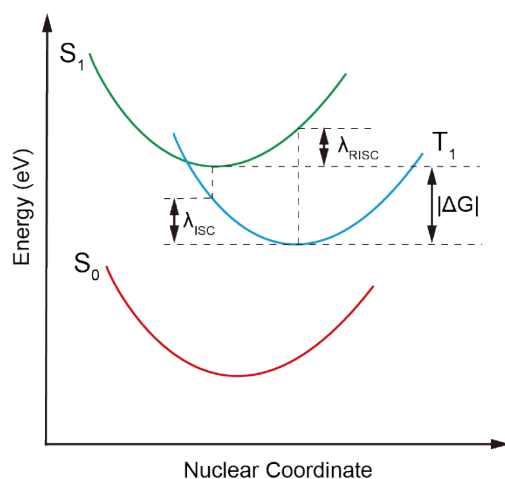

**Fig. S1** Potential energy surface of  $S_0$ ,  $S_1$  and  $T_1$ .

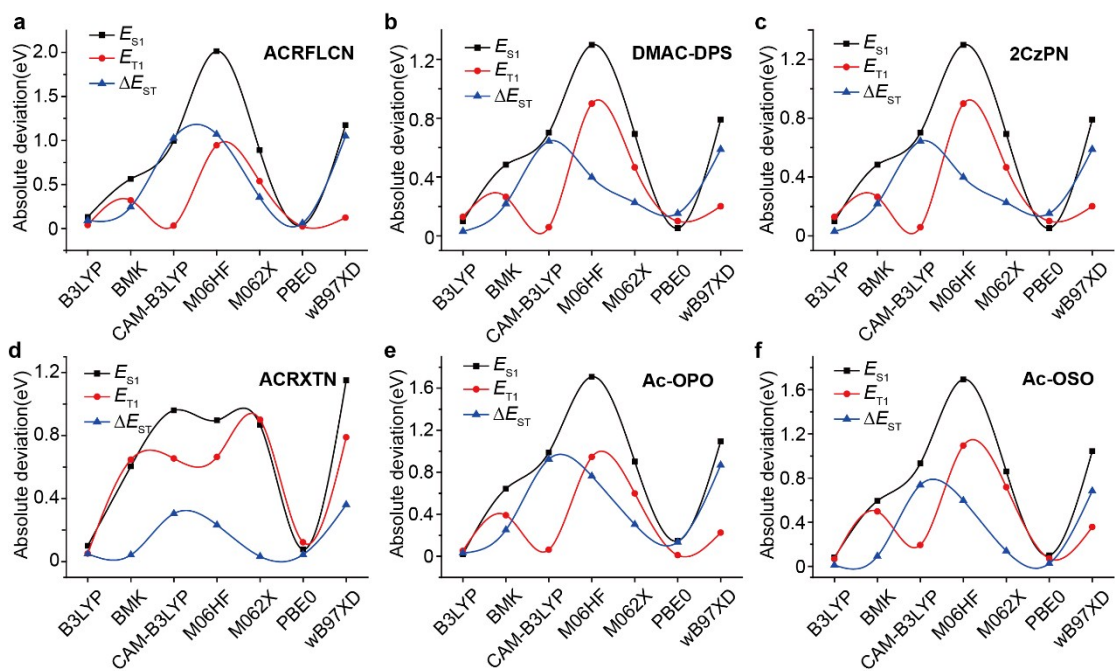

**Fig. S2** Absolute deviation of  $E_{S1}$ ,  $E_{T1}$  and  $\Delta E_{ST}$  of 7 different functionals against experimental values.

**Table S1** Absolute variation of Calculated  $E_{S_1}$ ,  $E_{T_1}$ ,  $\Delta E_{ST}$  using different functionals against Experimental Data.

| Functionals     | $E_S/E_T/\Delta E_{ST}(eV)$ |                |                |                |                |                |
|-----------------|-----------------------------|----------------|----------------|----------------|----------------|----------------|
|                 | ACRFLCN                     | DMAC-DPS       | 2CzPN          | ACRXTN         | Ac-OPO         | Ac-OSO         |
| B3LYP           | 2.55/2.54/0.01              | 2.73/2.72/0.01 | 2.84/2.50/0.34 | 2.43/2.42/0.01 | 3.09/3.03/0.06 | 2.94/2.89/0.05 |
| BMK             | 3.24/2.90/0.34              | 3.39/3.38/0.02 | 3.42/2.89/0.53 | 3.13/3.12/0.02 | 3.75/3.47/0.28 | 3.61/3.46/0.16 |
| CAM-B3LYP       | 3.68/2.55/1.13              | 3.70/3.13/0.57 | 3.64/2.69/0.95 | 3.49/3.13/0.36 | 4.10/3.14/0.96 | 3.95/3.15/0.80 |
| M06HF           | 4.69/3.52/1.17              | 4.27/3.83/0.44 | 4.24/3.53/0.71 | 3.43/3.13/0.29 | 4.82/4.02/0.79 | 4.71/4.05/0.66 |
| M062X           | 3.57/3.12/0.45              | 3.61/3.59/0.02 | 3.63/3.10/0.54 | 3.40/3.37/0.03 | 4.01/3.68/0.33 | 3.88/3.68/0.20 |
| PBE0            | 2.72/2.56/0.16              | 2.89/2.88/0.02 | 2.99/2.53/0.46 | 2.61/2.59/0.02 | 3.25/3.09/0.16 | 3.12/3.03/0.09 |
| $\omega$ B97X-D | 3.85/2.70/1.15              | 3.85/3.27/0.58 | 3.73/2.83/0.90 | 3.68/3.26/0.42 | 4.20/3.31/0.89 | 4.06/3.32/0.75 |

**Table S2** Donor-acceptor dihedral angles of  $S_1$ ,  $T_1$  and their differences of investigated molecules.

| Molecule | Dihedral angle ( $^\circ$ ) |        | Dihedral angle change ( $^\circ$ ) |
|----------|-----------------------------|--------|------------------------------------|
|          | $S_1$                       | $T_1$  |                                    |
| Ac-OPO   | 91.98                       | 83.62  | 8.36                               |
| Ac-OSO   | 86.41                       | 83.84  | 2.57                               |
| ACRXTN   | 90.02                       | 90.09  | 0.07                               |
| DMAC-DPS | 89.83                       | 89.87  | 0.04                               |
| ACRFLCN  | 102.97                      | 102.26 | 0.71                               |
| 2CzPN    | 52.27                       | 51.97  | 0.30                               |

**Table S3** Calculated configuration proportion  $\alpha_n\%$  of HONTO for  $S_1$ ,  $T_1$  and  $T_2$  state based on MPA of ACRFLCN.

| Atom  | Basis | $\alpha_n^i(\text{HONTO})$ |       |        |
|-------|-------|----------------------------|-------|--------|
|       |       | $S_1$                      | $T_1$ | $T_2$  |
| 10(N) | $P_y$ | 27.04%                     | -     | 26.94% |
| 28(N) | $P_z$ | -                          | 6.69% | -      |
| 30(N) | $P_z$ | -                          | 6.69% | -      |

**Table S4** Calculated configuration proportion  $\alpha_n\%$  of HONTO for  $S_1$ ,  $T_1$  and  $T_2$  state based on MPA of **DMAC-DPS**.

| Atom  | Basis | $\alpha_n^i(\text{HONTO})$ |        |        |
|-------|-------|----------------------------|--------|--------|
|       |       | $S_1$                      | $T_1$  | $T_2$  |
| 24(N) | $P_z$ | 28.39%                     | -      | 28.47% |
| 46(N) | $P_x$ | -                          | 2.29%  | -      |
| 46(N) | $P_y$ | -                          | 0.90%  | -      |
| 46(N) | $P_z$ | -                          | 20.30% | -      |

**Table S5** Calculated configuration proportion  $\alpha_n\%$  of HONTO for  $S_1$ ,  $T_1$  and  $T_2$  state based on MPA of **2CzPN**.

| Atom  | Basis | $\alpha_n^i(\text{HONTO})$ |       |       |
|-------|-------|----------------------------|-------|-------|
|       |       | $S_1$                      | $T_1$ | $T_2$ |
| 8(N)  | $P_z$ | -                          | 3.61% | 0.56% |
| 10(N) | $P_z$ | -                          | 3.61% | 0.56% |
| 13(N) | $P_x$ | 3.08%                      | 2.61% | 2.60% |
| 13(N) | $P_y$ | 2.37%                      | 1.76% | 2.67% |
| 13(N) | $P_z$ | 6.06%                      | 5.39% | 6.15% |
| 34(N) | $P_x$ | 3.08%                      | 2.61% | 2.60% |
| 34(N) | $P_y$ | 2.37%                      | 1.76% | 2.67% |
| 34(N) | $P_z$ | 6.05%                      | 5.39% | 6.15% |

**Table S6** Calculated configuration proportion  $\alpha_n\%$  of HONTO for  $S_1$ ,  $T_1$  and  $T_2$  state based on MPA of **ACRXTN**.

| Atom  | Basis | $\alpha_n^i(\text{HONTO})$ |       |        |
|-------|-------|----------------------------|-------|--------|
|       |       | $S_1$                      | $T_1$ | $T_2$  |
| 15(O) | $P_x$ | -                          | -     | 67.73% |
| 15(O) | $P_y$ | -                          | 3.21% | 0.73%  |
| 15(O) | $P_z$ | -                          | 1.79% | 8.84%  |

|       |                |        |        |   |
|-------|----------------|--------|--------|---|
| 23(N) | P <sub>x</sub> | 0.63%  | 0.55%  | - |
| 23(N) | P <sub>y</sub> | 0.90%  | 0.62%  | - |
| 23(N) | P <sub>z</sub> | 24.74% | 22.35% | - |

**Table S7** Calculated configuration proportion  $\alpha_n\%$  of HONTO for S<sub>1</sub>, T<sub>1</sub> and T<sub>2</sub> state based on MPA of **Ac-OPO**.

| Atom  | Basis          | $\alpha_n^i(\text{HONTO})$ |                |                |
|-------|----------------|----------------------------|----------------|----------------|
|       |                | S <sub>1</sub>             | T <sub>1</sub> | T <sub>2</sub> |
| 23(N) | P <sub>x</sub> | 2.15%                      | 2.10%          | 1.17%          |
| 23(N) | P <sub>y</sub> | 2.91%                      | 2.83%          | 2.23%          |
| 23(N) | P <sub>z</sub> | 21.13%                     | 20.54%         | 16.20%         |

**Table S8** Calculated configuration proportion  $\alpha_n\%$  of HONTO for S<sub>1</sub>, T<sub>1</sub> and T<sub>2</sub> state based on MPA of **Ac-OSO**.

| Atom  | Basis          | $\alpha_n^i(\text{HONTO})$ |                |                |
|-------|----------------|----------------------------|----------------|----------------|
|       |                | S <sub>1</sub>             | T <sub>1</sub> | T <sub>2</sub> |
| 23(N) | P <sub>x</sub> | 0.86%                      | 0.86%          | 0.66%          |
| 23(N) | P <sub>z</sub> | 24.89%                     | 24.76%         | 18.34%         |

**Table S9**  $|s_H+s_L|$  (%) calculated based on NTO analysis of S<sub>0</sub> geometry.

| Transition                     | ACRFLCN | DMAC-DPS | 2CzPN | ACRXTN | Ac-OPO | Ac-OSO |
|--------------------------------|---------|----------|-------|--------|--------|--------|
| S <sub>1</sub> →T <sub>1</sub> | 198.6   | 196.8    | 172.7 | 199.1  | 186.4  | 193.6  |
| S <sub>1</sub> →T <sub>2</sub> | 101.5   | 199.6    | 178.8 | 85.6   | 126.1  | 137.1  |

**Table S10**  $|s_H-s_L|$  (%) calculated based on NTO analysis of T<sub>1</sub> geometry.

| Transition                     | ACRFLCN | DMAC-DPS | 2CzPN | ACRXTN | Ac-OPO | Ac-OSO |
|--------------------------------|---------|----------|-------|--------|--------|--------|
| S <sub>1</sub> →T <sub>1</sub> | 90.3    | 65.3     | 32.2  | 12.3   | 9.4    | 2.7    |
| S <sub>1</sub> →T <sub>2</sub> | 0.1     | 0.5      | 24.3  | 70.5   | 73.7   | 81.5   |

**Table S11** Calculated transition configuration of S<sub>1</sub> and T<sub>1</sub>-T<sub>3</sub> for **ACRFLCN**.



| Excited State  | Energy (eV) | Transition configuration (%)                                                         |
|----------------|-------------|--------------------------------------------------------------------------------------|
| S <sub>1</sub> | 2.5493      | H→L(99.72)                                                                           |
| T <sub>1</sub> | 2.541       | H→L(99.56)                                                                           |
| T <sub>2</sub> | 2.6532      | H-8→L+1(2.33);H-3→L(17.5);H-1→L(71.36)<br>H-4→L+9(4.12);H-3→L+5(3.16);H-2→L+8(4.44); |
| T <sub>3</sub> | 3.1841      | H-1→L+5(3.31);H→L+2(49.07);H→L+6(8.11);<br>H→L+7(23.85)                              |

**Table S12** Calculated transition configuration of S<sub>1</sub> and T<sub>1</sub>-T<sub>3</sub> for **DMAC-DPS**.

| Excited State  | Energy (eV) | Transition configuration (%)                                                         |
|----------------|-------------|--------------------------------------------------------------------------------------|
| S <sub>1</sub> | 2.7309      | H-1→L+2(5.06);H→L(93.94)                                                             |
| T <sub>1</sub> | 2.7202      | H-1→L+2(5.38);H→L(93.5)                                                              |
| T <sub>2</sub> | 2.7209      | H-1→L(93.46);H→L+2(5.4)                                                              |
| T <sub>3</sub> | 3.14        | H-5→L+4(2);H-4→L+5(2.01);H-1→L+3(16.38);<br>H-1→L+7(19.49);H→L+1(30.67);H→L+6(21.11) |

**Table S13** Calculated transition configuration of S<sub>1</sub> and T<sub>1</sub>-T<sub>3</sub> for **2CzPN**.

| Excited State  | Energy (eV) | Transition configuration (%)             |
|----------------|-------------|------------------------------------------|
| S <sub>1</sub> | 2.8503      | H→L(99.07)                               |
| T <sub>1</sub> | 2.5082      | H-8→L(2.35);H-6→L(8.4);H→L(83.71)        |
| T <sub>2</sub> | 2.7144      | H-1→L(95.96)                             |
| T <sub>3</sub> | 3.0042      | H-3→L+2(9.96);H-2→L(69.33);H-2→L+3(9.73) |

**Table S14** Calculated transition configuration of S<sub>1</sub> and T<sub>1</sub>-T<sub>3</sub> for **ACRXTN**.

| Excited State  | Energy (eV) | Transition configuration (%)                     |
|----------------|-------------|--------------------------------------------------|
| S <sub>1</sub> | 2.4298      | H→L(97.87)                                       |
| T <sub>1</sub> | 2.4187      | H→L(97.58)                                       |
| T <sub>2</sub> | 3.0795      | H-7→L(7.35);H-4→L(4.06);H-3→L(2.78);H-1→L(81.45) |
| S <sub>2</sub> | 3.5324      | H→L+1(95)                                        |

**Table S15** Calculated transition configuration of S<sub>1</sub> and T<sub>1</sub>-T<sub>3</sub> for **Ac-OPO**.

| Excited states | Energy (eV) | Transition configuration (%)                                                                   |
|----------------|-------------|------------------------------------------------------------------------------------------------|
| S <sub>1</sub> | 3.088       | H→L(97.07)                                                                                     |
| T <sub>1</sub> | 3.0272      | H→L(87.36);H→L+2(3.49);H→L+7(5.01)<br>H-4→L+9(2.65);H-3→L+6(3.65);H-                           |
| T <sub>2</sub> | 3.2475      | 1→L+8(3.21)H→L(6.25); H→L+1(35.18);<br>H→L+2(4.95);H→L+5(3.23);H→L+7(36.8)<br>H-3→L+6(2.55);H- |
| T <sub>3</sub> | 3.2933      | 1→L+8(2.44);H→L(2.07);H→L+1(53.57);<br>H→L+7(30.73)                                            |

**Table S16** Calculated transition configuration of S<sub>1</sub> and T<sub>1</sub>-T<sub>3</sub> for **Ac-OSO**.

| Excited states | Energy (eV) | Transition configuration (%)                                                   |
|----------------|-------------|--------------------------------------------------------------------------------|
| S <sub>1</sub> | 2.9404      | H→L(93.62);H→L+1(2.7);H→L+2(3.36)                                              |
| T <sub>1</sub> | 2.8934      | H→L(89.58);H→L+1(2.66);H→L+2(5.08)                                             |
| T <sub>2</sub> | 3.2382      | H→L+1(72.67);H→L+2(9.2);H→L+3(5.21);H→L+5(9.11)                                |
| T <sub>3</sub> | 3.2744      | H-4→L+7(4.2);H-2→L+4(6.01);H-1→L+6(5.58);H→L(3.91); H→L+1(12.47); H→L+5(63.34) |

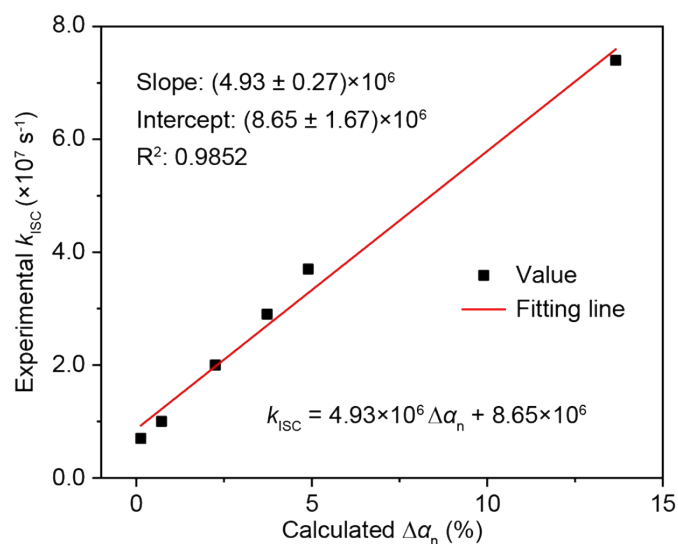

**Fig. S3** Empirical relation between the experimental  $k_{ISC}$  and calculated  $\Delta\alpha_n$ .

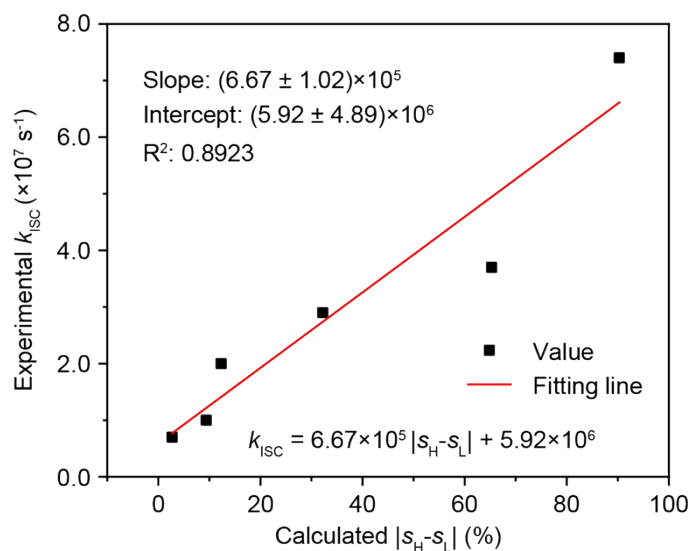

**Fig. S4** Empirical relation between the experimental  $k_{ISC}$  and calculated  $|s_H-s_L|$ .

## References

- 1 M. J. Frisch, G. W. Trucks, H. B. Schlegel, G. E. Scuseria, M. A. Robb, J. R. Cheeseman, G. Scalmani, V. Barone, B. Mennucci, G. A. Petersson, H. Nakatsuji, M. Caricato, X. Li, H. P. Hratchian, A. F. Izmaylov, J. Bloino, G. Zheng, J. L. Sonnenberg, M. Hada, M. Ehara, K. Toyota, R. Fukuda, J. Hasegawa, M. Ishida, T. Nakajima, Y. Honda, O. Kitao, H. Nakai, T. Vreven, J. A. Montgomery Jr., J. E. Peralta, F. Ogliaro, M. Bearpark, J. J. Heyd, E. Brothers, K. N. Kudin, V. N. Staroverov, R. Kobayashi, J. Normand, K. Raghavachari, A. Rendell, J. C. Burant, S. S. Iyengar, J. Tomasi, M. Cossi, N. Rega, J. M. Millam, M. Klene, J. E. Knox, J. B. Cross, V. Bakken, C. Adamo, J. Jaramillo, R. Gomperts, R. E. Stratmann, O. Yazyev, A. J. Austin, R. Cammi, C. Pomelli, J. W. Ochterski, R. L. Martin, K. Morokuma, V. G. Zakrzewski, G. A. Voth, P. Salvador, J. J. Dannenberg, S. Dapprich, A. D. Daniels, O. Farkas, J. B. Foresman, J. V. Ortiz, J. Cioslowski and D. J. Fox, *Gaussian 09 (Gaussian, Inc., Wallingford, CT)*, 2009 **Vol. 1**.
- 2 A. D. Becke, *J. Chem. Phys.*, 1993, **98**, 5648.
- 3 C. T. Lee, W. T. Yang and R. G. Parr, *Phys. Rev. B*, 1988, **37**, 785.
- 4 T. Lu and F. Chen, *J. Comput. Chem.*, 2012, **33**, 580.
- 5 K. Aidas, C. Angeli, K. L. Bak, V. Bakken, R. Bast, L. Boman, O. Christiansen, R. Cimraglia, S. Coriani, P. Dahle, E. K. Dalskov, U. Ekstrom, T. Enevoldsen, J. J. Eriksen, P. Ettenhuber, B. Fernandez, L. Ferrighi, H. Fliegl, L. Frediani, K. Hald, A. Halkier, C. Hattig, H. Heiberg, T. Helgaker, A. C. Hennum, H. Hettema, E. Hjertenaes, S. Host, I. Hoyvik, M. F. Iozzi, B. Jansik, H. J. A. Jensen, D. Jonsson, P. Jorgensen, J. Kauczor, S. Kirpekar, T. Kjrgaard, W. Klopper, S. Knecht, R. Kobayashi, H. Koch, J. Kongsted, A. Krapp, K. Kristensen, A. Ligabue, O. B. Lutnaes, J. I. Melo, K. V. Mikkelsen, R. H. Myhre, C. Neiss, C. B. Nielsen, P. Norman, J. Olsen, J. M. H. Olsen, A. Osted, M. J. Packer, F. Pawłowski, T. B. Pedersen, P. F. Provasi, S. Reine, Z. Rinkevicius, T. A. Ruden, K. Ruud, V. V. Rybkin, P. Salek, C. C. M. Samson, A. S. de Meras, T. Saue, S. P. A. Sauer, B. Schimmelpfennig, K. Sneskov, A. H. Steindal, K. O. Sylvester-Hvid, P. R. Taylor, A. M. Teale, E. I. Tellgren, D. P. Tew, A. J. Thorvaldsen, L. Thogersen, O. Vahtras, M. A. Watson, D. J. D. Wilson, M. Ziolkowski and H. Agren, *Wires. Comput. Mol. Sci.*, 2014, **4**, 269.
